# Supplementary material
Source: PubMed Central journal article supplement (PMC2716635)
Supplement: mmc1.pdf [file mmc1.pdf]

Biophysical Journal, Volume 96

**Supporting Material**

**Functional and Structural Characterization of Factor Xa Dimer In Solution**

Rima Chattopadhyay, Roxana Iacob, Shalmali Sen, Rinku Majumder, Kenneth B. Tomer,  
and Barry R. Lentz

## Supplemental Material

Table S1

| Residue changes<br>3 mM Ca <sup>+2</sup> to<br>3 mM Ca <sup>+2</sup> + C6PS | Residue changes<br>5 mM Ca <sup>+2</sup> to<br>5 mM Ca <sup>+2</sup> + C6PS | Residue changes<br>due to<br>dimerization |
|-----------------------------------------------------------------------------|-----------------------------------------------------------------------------|-------------------------------------------|
| 9 → 9                                                                       | 9 → 9                                                                       |                                           |
| 62 → 62                                                                     | 62 → 62                                                                     |                                           |
| 79 → 79                                                                     | 79 → 79                                                                     |                                           |
| 242 → 242 (62)                                                              | 242 → 242                                                                   |                                           |
| 270 → 270 (90)                                                              | 270 → 270                                                                   | 270                                       |
| 276 → 276 (96)                                                              | 276 → 276                                                                   |                                           |
| 289 → 289 (109)                                                             | 289 → 289                                                                   |                                           |
| 317 → 317 (134)                                                             | 317 → 317                                                                   |                                           |
| 330 → 330 (147)                                                             | 330 → 330                                                                   |                                           |
| 338 → 338 (156)                                                             | 338 → 338                                                                   |                                           |
| 351 → 351 (169)                                                             | 351 → 351                                                                   |                                           |
| 388 → 388 (204)                                                             | 388 → 388                                                                   |                                           |
| 406 → 406 (223)                                                             | 406 → 406                                                                   |                                           |
| 408 → 408 (224)                                                             | 408 → 408                                                                   |                                           |
| 414 → 414 (230)                                                             | 414 → 414                                                                   | 414                                       |
| 420 → 420 (236)                                                             | 420 → 420                                                                   |                                           |
| 427 → 427 (243)                                                             | 427 → 427                                                                   |                                           |

Table S2

| Residue changes<br>3 mM Ca <sup>+2</sup> TO mM 5 Ca <sup>+2</sup> | Residue changes<br>3 mM Ca <sup>+2</sup> + C6PS TO<br>5 mM Ca <sup>+2</sup> + C6PS | Residue changes<br>due to<br>dimerization |
|-------------------------------------------------------------------|------------------------------------------------------------------------------------|-------------------------------------------|
| 9 → 9                                                             | 9 → 9                                                                              |                                           |
| 62 → 62                                                           | 62 → 62                                                                            |                                           |
| 79 → 79                                                           | 79 → 79                                                                            |                                           |
| 242 → 242 (62)                                                    | 242 → 242                                                                          |                                           |
| 270 → 270 (90)                                                    | 270 → 270                                                                          | 270                                       |
| 276 → 276 (96)                                                    | 221 → 221                                                                          |                                           |
| 289 → 289 (109)                                                   | 289 → 289                                                                          |                                           |
| 317 → 317 (134)                                                   | 317 → 317                                                                          |                                           |
| 330 → 330 (147)                                                   | 330 → 330                                                                          |                                           |
| 338 → 338 (156)                                                   | 338 → 338                                                                          |                                           |
| 351 → 351 (169)                                                   | 351 → 351                                                                          |                                           |
| 388 → 388 (204)                                                   | 388 → 388                                                                          |                                           |
| 406 → 406 (223)                                                   | 406 → 406                                                                          |                                           |
| 408 → 408 (224)                                                   | 408 → 408                                                                          |                                           |
| 414 → 414 (230)                                                   | 414 → 414                                                                          | 414                                       |
| 420 → 420 (236)                                                   | 420 → 420                                                                          |                                           |
| 427 → 427 (243)                                                   | 427 → 427                                                                          |                                           |

**Table S: Change in Lys residues upon addition of C6PS and Calcium determined from Lys acetylation followed by mass spectrometry.** S1) Columns 1 and 2 show Lys residues that change upon addition of C6PS at 3 mM and 5 mM  $\text{Ca}^{+2}$ , respectively, S2) Columns 1 and 2 show Lys residues that change upon increase from 3 mM to 5 mM  $\text{Ca}^{+2}$  in the absence and presence of 400  $\mu\text{M}$  C6PS, respectively. **Blue** = residues accessible to both acetylation and enzymatic digestion, **Green** = residues not accessible to acetylation but observed after enzymatic digestion, **Red** = residues not observed at all. Numberings of the Lysine residues are according to Fung et al., Proceedings of the National Academy of Sciences, 1985, 82, 3591-3595. Parenthesis shows the chymotrypsin numbering for the amino acid residues in the catalytic domain. In Pedersen model Fung Numbering system is followed.
